# Supplementary material for: Solution synthesis of triangular and hexagonal nickel nanosheets with the aid of tungsten hexacarbonyl
Source: Royal Society of Chemistry journal article supplement (doi:10.1039/c5ce02187a), 2016-01-01
Supplement: c5ce02187a1.pdf [file c5ce02187a1.pdf]

## Electronic Supplementary Information

### Solution synthesis of triangular and hexagonal nickel nanosheets with the aid of tungsten hexacarbonyl

Zhichao Wang, Yuanzhi Chen, Deqian Zeng, Qinfu Zhang and Dong-Liang Peng

*Department of Materials Science and Engineering, College of Materials, Xiamen University,  
Xiamen 361005, People's Republic of China*

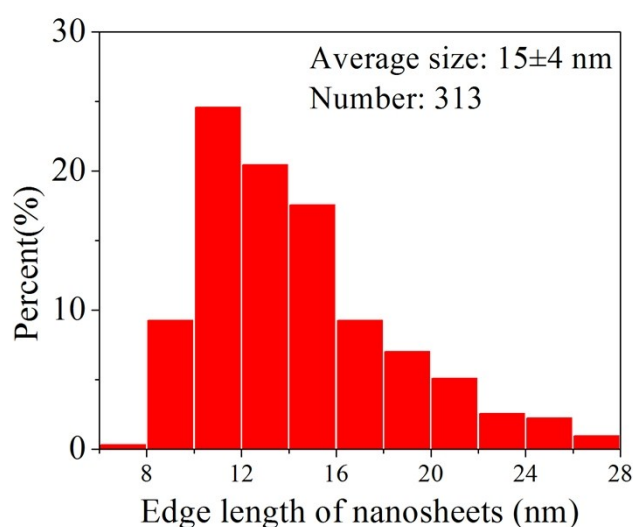

**Fig. S1** Size distribution histogram of the 15 nm Ni nanosheets.

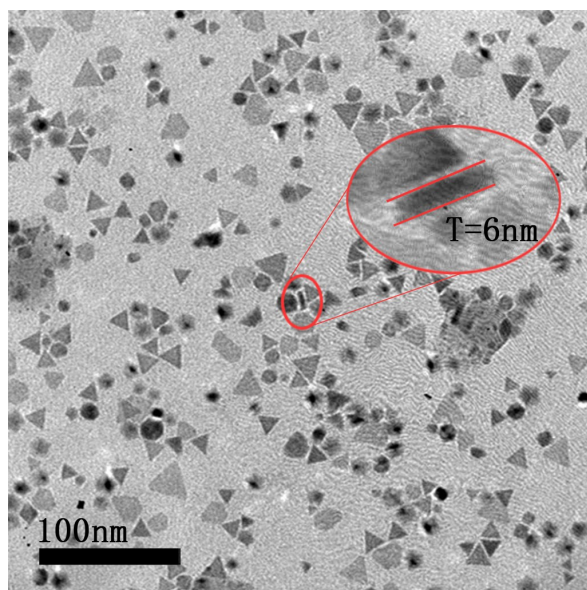

**Fig. S2** TEM image showing a standing nanosheet (red circled region) which reveals the thickness dimension.

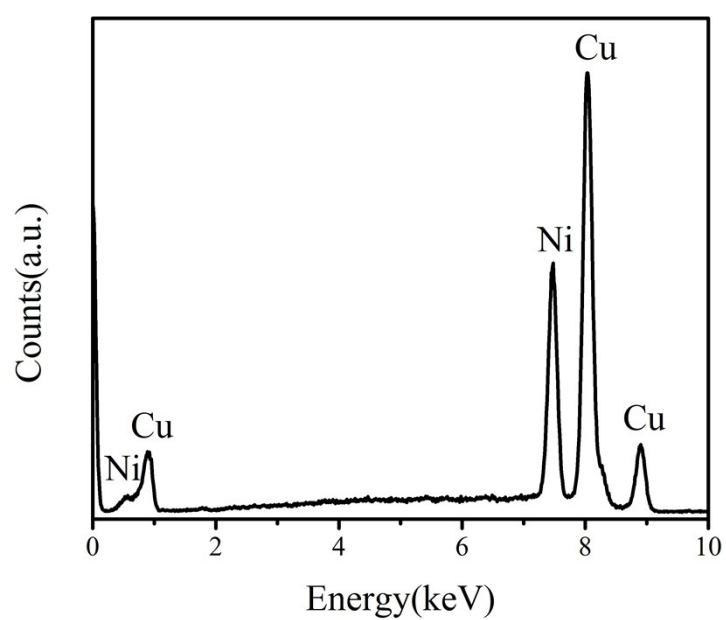

**Fig. S3** EDS spectrum of the prepared 15 nm Ni nanosheets.

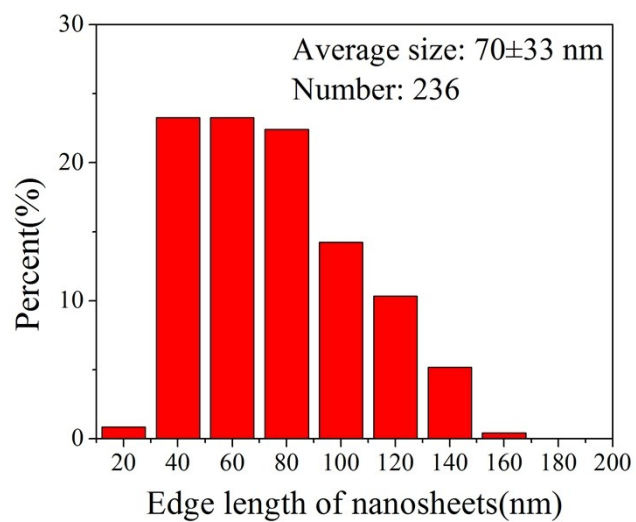

**Fig. S4** Size distribution histogram of the 70 nm Ni nanosheets.

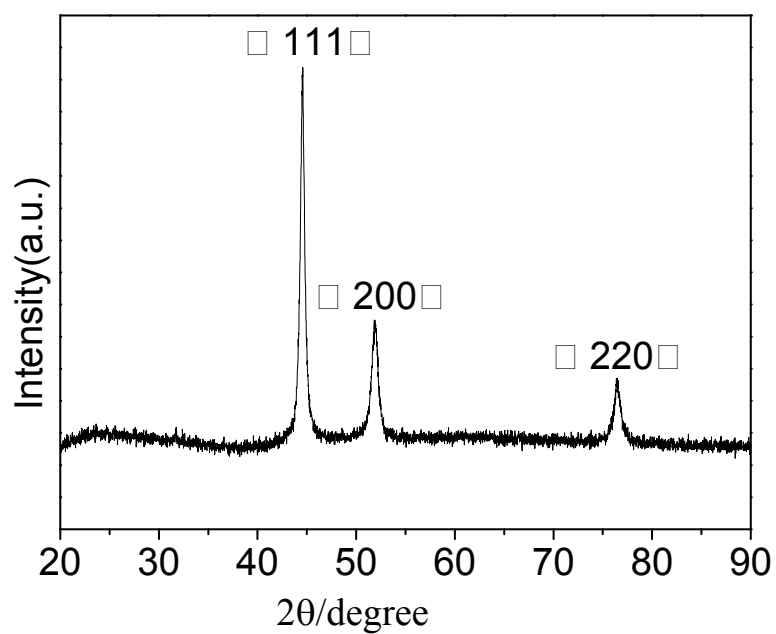

**Fig. S5** XRD pattern of the prepared 70 nm Ni nanosheets.

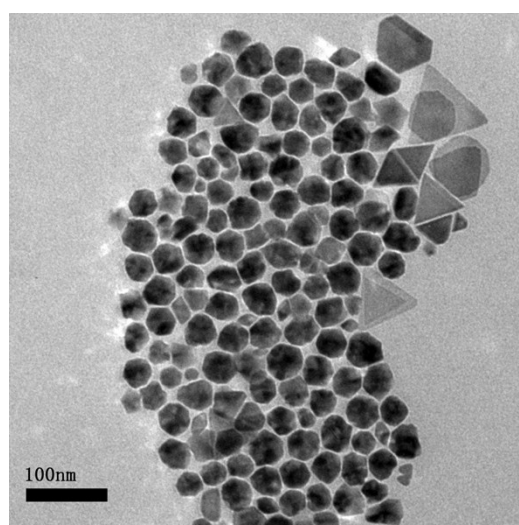

**Fig. S6** TEM image of the product obtained after reacting at 150 °C for 1 hour.

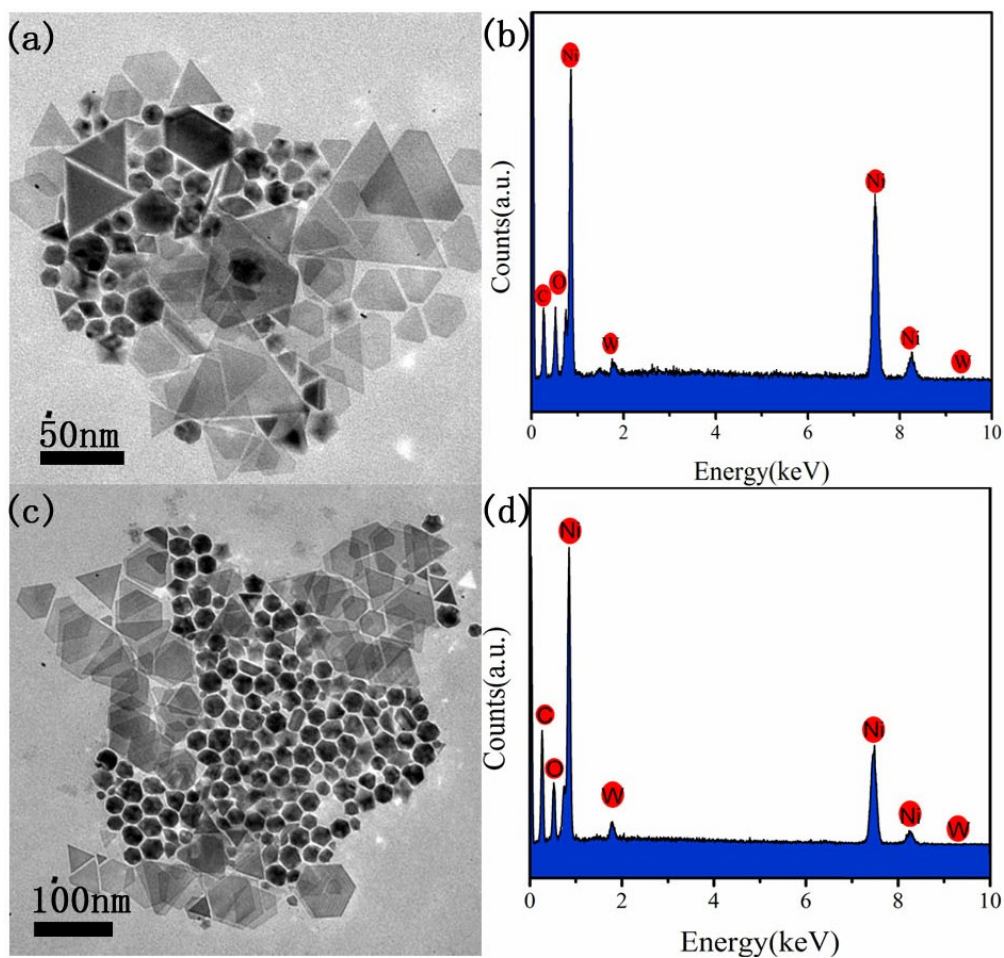

**Fig. S7** (a) and (c) are the TEM images of the products synthesized with different amounts of  $\text{W(CO)}_6$  (a: 1 mmol; c: 2 mmol). (b) and (d) are the corresponding EDS spectra obtained from the SEM-EDS analyses on the bulk sample powders (b: 1 mmol; d: 2 mmol  $\text{W(CO)}_6$ ). The determined relative contents of W are only 0.079% (b) and 1.6% (d) of that of Ni.

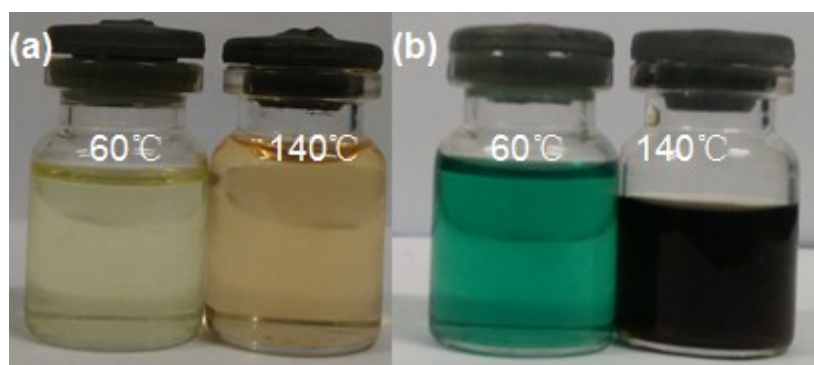

**Fig. S8** Color change of the mixed solution of OAm and  $\text{W(CO)}_6$  (a) and the mixed solution of OAm,  $\text{W(CO)}_6$ , and  $\text{Ni(acac)}_2$  (b) at different temperatures.

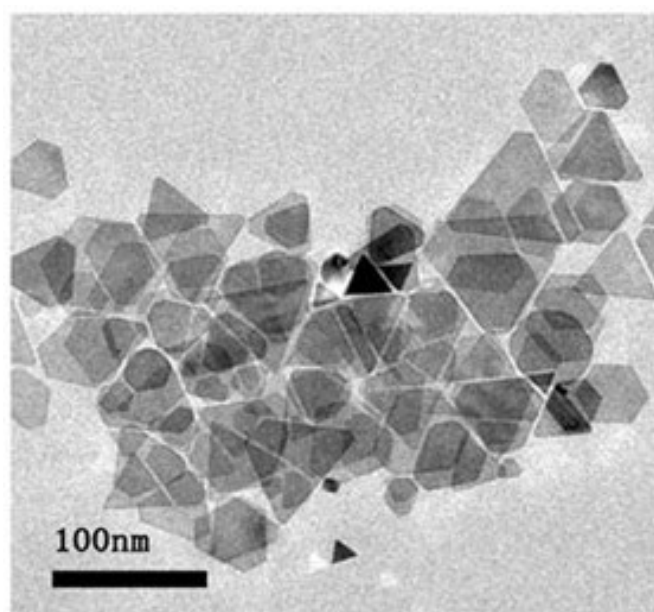

**Fig. S9** TEM image of the Ni nanosheets obtained after injecting 1 mL of oleic acid into the reaction system at 160 °C.

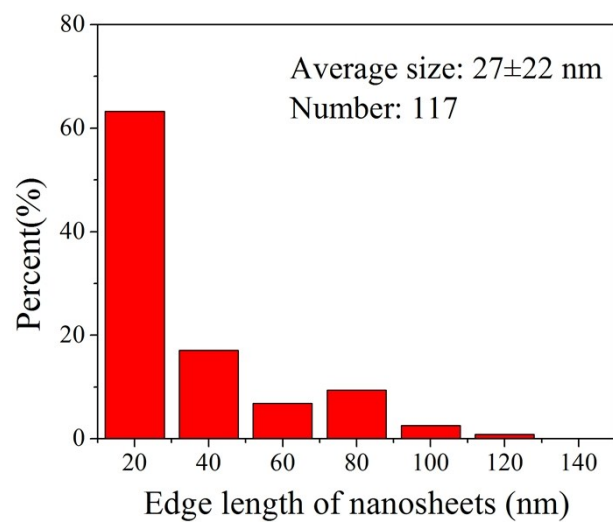

**Fig. S10** Size distribution histogram of the product at 160 °C with an aging time of 1 h.

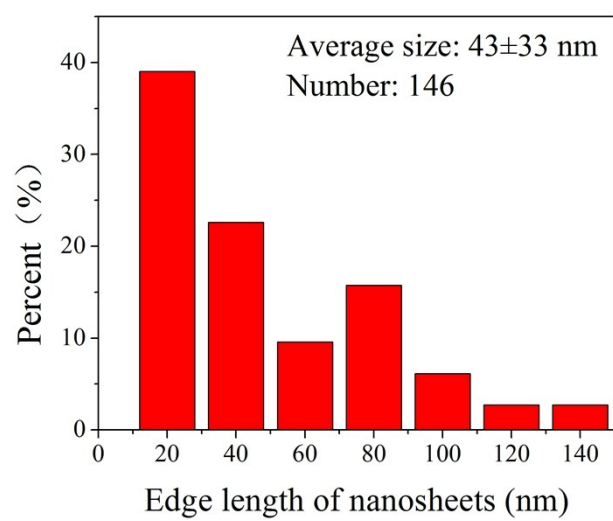

**Fig. S11** Size distribution histogram of the product at 170 °C with an aging time of 1 h.

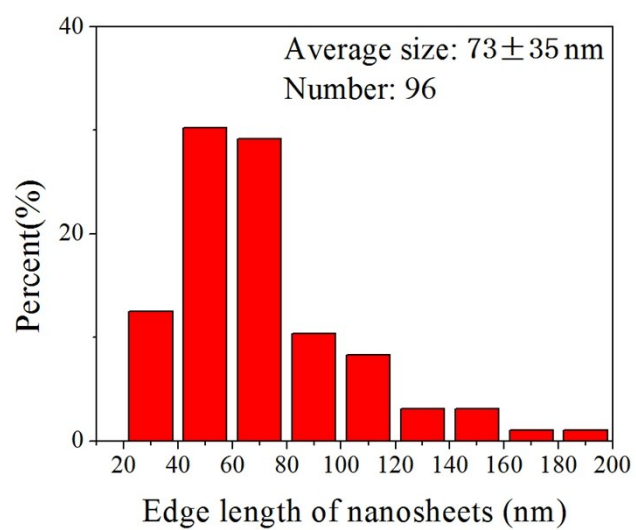

**Fig. S12** Size distribution histogram of the product at 200 °C with an aging time of 1 h.
